# Supplementary material for: Predicting asthma attacks in primary care: protocol for developing a machine learning-based prediction model
Source: PubMed Central journal article supplement (PMC6624024; doi:10.1136/bmjopen-2018-028375), 2019-07-09
Supplement: bmjopen-2018-028375supp001.pdf [file bmjopen-2018-028375supp001.pdf]

## Appendix A – Data harmonisation plan

| Variable                                             | Derivation dataset (LHS) format                                                                   | External (unseen; SIVE II) dataset format                               | Harmonised format                                                                                                                                               |
|------------------------------------------------------|---------------------------------------------------------------------------------------------------|-------------------------------------------------------------------------|-----------------------------------------------------------------------------------------------------------------------------------------------------------------|
| Sex                                                  | Character – “M”, “F” and “I” (less than 0.001% of records)                                        | Character – “M”, “F”                                                    | Character – “M”, “F” and “I”                                                                                                                                    |
| Birthday                                             | Age (integer) at data extraction date (31 <sup>st</sup> March 2018) or deduction date (indicated) | YYYY-MM-DD date format, all days set to 01 (true day redacted)          | Age on March 31 <sup>st</sup> , 2015 (approximate)                                                                                                              |
| Scottish Index of Multiple Deprivation               | Quintiles, 2012 and 2009 values                                                                   | Deciles, 2012 values                                                    | Quintiles, 2012 values                                                                                                                                          |
| Scottish Government Urban Rural Classification Scale | 6-fold scale, from (1) Large Urban Areas to (6) Remote Rural Areas                                | 8-fold scale, from (1) Large Urban Areas to (8) Very Remote Rural Areas | 6-fold scale, from (1) Large Urban Areas to (6) Remote Rural Areas, 8-fold scale recoded as follows:<br>1 > 1<br>2 > 2<br>3 > 3<br>4, 5 > 4<br>6 > 5<br>7,8 > 6 |
| Cause of death                                       | ICD10 coded primary field, and 10 secondary cause fields                                          | ICD10 coded primary field, and 10 secondary cause fields                | <i>Aligned</i>                                                                                                                                                  |
| A&E cause of presentation                            | Presenting complaint free text field and 3 ICD10 coded disease fields                             | Presenting complaint free text field and 3 ICD10 coded disease fields   | <i>Aligned</i>                                                                                                                                                  |
| Primary care records                                 | Read Codes (version 2)                                                                            | Read Codes (version 2)                                                  | <i>Aligned</i>                                                                                                                                                  |
| Primary care prescriptions                           | Standardised <sup>a</sup> text drug name and dose fields                                          | Standardised <sup>a</sup> text drug name and dose fields                | <i>Aligned</i>                                                                                                                                                  |
| Hospital inpatient admission records                 | N/A                                                                                               | ICD10 coded primary field, and 5 secondary cause fields                 | <i>Omitted as alignment not possible</i>                                                                                                                        |
| Event Date                                           | Standardised date format                                                                          | Standardised date format                                                | <i>Aligned</i>                                                                                                                                                  |

<sup>a</sup> Auto-fill assisted free text field
